# Supplementary material for: In Utero and Childhood Polybrominated Diphenyl Ether (PBDE) Exposures and Neurodevelopment in the CHAMACOS Study
Source: PubMed Central journal article supplement (PMC3569691; doi:10.1289/ehp.1205597), 2012-11-15
Supplement: ehp.1205597.s001.pdf [file ehp.1205597.s001.pdf]

**Supplemental Material: *In Utero* and Childhood Polybrominated Diphenyl Ether  
(PBDE) Exposures and Neurodevelopment in the CHAMACOS Study**

Brenda Eskenazi<sup>1</sup>, Jonathan Chevrier<sup>1</sup>, Stephen A. Rauch<sup>1</sup>, Katherine Kogut<sup>1</sup>, Kim G. Harley<sup>1</sup>,  
Caroline Johnson<sup>1</sup>, Celina Trujillo<sup>1</sup>, Andreas Sjodin<sup>2</sup>, Asa Bradman<sup>1</sup>

<sup>1</sup>Center for Environmental Research and Children’s Health (CERCH), School of Public Health,  
University of California at Berkeley, Berkeley, CA

<sup>2</sup>Division of Laboratory Sciences, National Center for Environmental Health, Centers for  
Disease Control and Prevention, Atlanta, GA

**Contents:**

**Supplemental Table S1:** Detection and concentrations  
of PBDE congeners in maternal serum.....2

**Supplemental Table S2:** Detection and concentration of  
PBDE congeners in child serum collected at age 7 years of age.....3

**Supplemental Table S3:** Distributions of sociodemographic  
characteristics for the CHAMACOS children by maternal  
and child  $\Sigma$ PBDE serum concentrations.....4

**Supplemental Table S4:** Means and standard deviations  
for attention, neurodevelopment, and motor outcomes  
in the CHAMACOS Cohort at 5- and 7-year visits .....7

**Supplemental Table S5:** Adjusted logistic models for dichotomous  
attention-related outcomes in CHAMACOS children age 5 and 7 years .....9

**Supplemental Table S6:** Results for models using the sum of 4  
PBDE congeners (primary analysis), sum of 10 congeners,  
and individual congeners BDE-47, -99, -100, and -153 .....11

**Supplemental Material, Table S1:** Detection and concentrations of PBDE congeners in maternal serum

| PBDEs                 | N <sup>a</sup> | LOD <sup>b</sup> range<br>(ng/g) | Detection<br>freq <sup>c</sup> (%) | GM (95% CI) <sup>d</sup><br>(ng/g) | Min<br>(ng/g) | 10 <sup>th</sup> %<br>(ng/g) | 25 <sup>th</sup> %<br>(ng/g) | Median<br>(ng/g) | 75 <sup>th</sup> %<br>(ng/g) | 90 <sup>th</sup> %<br>(ng/g) | Max<br>(ng/g) |
|-----------------------|----------------|----------------------------------|------------------------------------|------------------------------------|---------------|------------------------------|------------------------------|------------------|------------------------------|------------------------------|---------------|
| ∑4 PBDE <sup>e</sup>  | 279            | 0.2-2.6                          | 100.0 <sup>f</sup>                 | 26.3 (23.4, 29.6)                  | 2.6           | 8.0                          | 14.0                         | 24.9             | 42.1                         | 84.8                         | 1293.7        |
| ∑10 PBDE <sup>g</sup> | 279            | 0.2-2.6                          | 100.0 <sup>f</sup>                 | 28.7 (25.7, 32.1)                  | 4.2           | 9.2                          | 14.9                         | 27.1             | 45.1                         | 90.0                         | 1379.4        |
| BDE-17                | 278            | 0.2–0.7                          | 1.4                                | 0.05 (0.04, 0.05)                  | <LOD          | <LOD                         | <LOD                         | <LOD             | <LOD                         | <LOD                         | 2.78          |
| BDE-28                | 278            | 0.2–0.7                          | 51.1                               | 0.38 (0.32, 0.45)                  | <LOD          | <LOD                         | <LOD                         | 0.4              | 1.1                          | 2.2                          | 24.1          |
| BDE-47                | 279            | 0.3–2.6                          | 99.3                               | 15.8 (14.0, 17.8)                  | <LOD          | 4.6                          | 8.1                          | 15.7             | 26.6                         | 51.8                         | 761.0         |
| BDE-66                | 278            | 0.2–0.7                          | 14.0                               | 0.15 (0.13, 0.17)                  | <LOD          | <LOD                         | <LOD                         | <LOD             | <LOD                         | 0.4                          | 10.1          |
| BDE-85                | 279            | 0.2–0.7                          | 43.0                               | 0.37 (0.33, 0.42)                  | <LOD          | <LOD                         | <LOD                         | <LOD             | 0.6                          | 1.1                          | 27.4          |
| BDE-99                | 279            | 0.2–0.7                          | 98.6                               | 4.5 (4.0, 5.1)                     | <LOD          | 1.4                          | 2.3                          | 4.2              | 7.2                          | 13.9                         | 297.6         |
| BDE-100               | 279            | 0.2–0.7                          | 97.5                               | 2.8 (2.5, 3.2)                     | <LOD          | 0.8                          | 1.5                          | 2.6              | 4.7                          | 9.6                          | 138.3         |
| BDE-153               | 279            | 0.2–0.7                          | 97.5                               | 2.4 (2.1, 2.7)                     | <LOD          | 0.8                          | 1.4                          | 2.1              | 3.9                          | 7.8                          | 96.9          |
| BDE-154               | 279            | 0.2–0.7                          | 40.1                               | 0.38 (0.34, 0.43)                  | <LOD          | <LOD                         | <LOD                         | <LOD             | 0.6                          | 1.2                          | 20.6          |
| BDE-183               | 279            | 0.2–0.7                          | 26.3                               | 0.31 (0.28, 0.33)                  | <LOD          | <LOD                         | <LOD                         | <LOD             | 0.4                          | 0.6                          | 10.8          |

All measures are lipid-adjusted (ng/g lipids)

<sup>a</sup>Includes children participating in 5- or 7-year neurodevelopmental assessment, minus exclusions for serious conditions or multiple births.

<sup>b</sup>Limit of Detection.

<sup>c</sup>Detection frequency.

<sup>d</sup>Geometric mean and 95% Confidence interval.

<sup>e</sup>Sum of four PBDE congeners: BDE-47, -99, -100, and -153.

<sup>f</sup>Percentage of samples with at least one congener above the limit of detection.

<sup>g</sup>Sum of all 10 PBDE congeners: BDE-17, -28, -47, -66, -85, -99, -100, -153, -154, and -183.

**Supplemental Material, Table S2:** Detection and concentration of PBDE congeners in child serum collected at age 7 years of age.

| PBDEs                 | N <sup>a</sup> | LOD <sup>b</sup> range<br>(ng/g) | Detection<br>freq <sup>c</sup> (%) | GM (95% CI) <sup>d</sup><br>(ng/g) | Min<br>(ng/g) | 10 <sup>th</sup> %<br>(ng/g) | 25 <sup>th</sup> %<br>(ng/g) | Median<br>(ng/g) | 75 <sup>th</sup> %<br>(ng/g) | 90 <sup>th</sup> %<br>(ng/g) | Max<br>(ng/g) |
|-----------------------|----------------|----------------------------------|------------------------------------|------------------------------------|---------------|------------------------------|------------------------------|------------------|------------------------------|------------------------------|---------------|
| ∑4 PBDE <sup>e</sup>  | 270            | 0.3–5.6                          | 100.0 <sup>f</sup>                 | 84.4 (76.8, 92.7)                  | 5.8           | 31.4                         | 49.9                         | 84.6             | 129.7                        | 228.1                        | 1308.5        |
| ∑10 PBDE <sup>g</sup> | 270            | 0.3–5.6                          | 100.0 <sup>f</sup>                 | 90.9 (82.8, 99.7)                  | 6.9           | 34.8                         | 54.4                         | 91.8             | 141.6                        | 241.1                        | 1385.5        |
| BDE-17                | 270            | 0.3–5.6                          | 35.2                               | 0.55 (0.50, 0.60)                  | <LOD          | <LOD                         | <LOD                         | <LOD             | 0.9                          | 1.6                          | 11.8          |
| BDE-28                | 270            | 0.3–5.6                          | 87.4                               | 2.0 (1.8, 2.2)                     | <LOD          | <LOD                         | 1.3                          | 2.1              | 3.5                          | 5.6                          | 23.2          |
| BDE-47                | 270            | 0.4–0.8                          | 100.0                              | 47.3 (42.8, 52.3)                  | 1.9           | 17.4                         | 27.8                         | 46.9             | 77.3                         | 135.4                        | 768.2         |
| BDE-66                | 270            | 0.3–5.6                          | 37.0                               | 0.56 (0.51, 0.61)                  | <LOD          | <LOD                         | <LOD                         | <LOD             | 0.9                          | 1.5                          | 6.8           |
| BDE-85                | 270            | 0.3–5.6                          | 64.1                               | 0.94 (0.86, 1.04)                  | <LOD          | <LOD                         | <LOD                         | 0.9              | 1.6                          | 2.6                          | 14.6          |
| BDE-99                | 270            | 0.3–5.6                          | 99.6                               | 11.1 (10.0, 12.4)                  | <LOD          | 3.7                          | 6.2                          | 10.6             | 19.2                         | 36.1                         | 218.2         |
| BDE-100               | 270            | 0.3–5.6                          | 100.0                              | 10.7 (9.8, 11.8)                   | 0.8           | 3.9                          | 5.9                          | 10.9             | 16.8                         | 32.6                         | 144.0         |
| BDE-153               | 270            | 0.3–5.6                          | 100.0                              | 12.2 (11.1, 13.3)                  | 0.9           | 4.9                          | 6.8                          | 11.5             | 19.9                         | 32.6                         | 263.1         |
| BDE-154               | 270            | 0.3–5.6                          | 77.8                               | 1.2 (1.1, 1.4)                     | <LOD          | <LOD                         | 0.7                          | 1.1              | 1.9                          | 3.5                          | 19.0          |
| BDE-183               | 270            | 0.3–5.6                          | 20.0                               | 0.46 (0.43, 0.50)                  | <LOD          | <LOD                         | <LOD                         | <LOD             | <LOD                         | 0.9                          | 17.0          |

All measures are lipid-adjusted (ng/g lipids)

<sup>a</sup>Includes children participating in 5- or 7-year neurodevelopmental assessment, minus exclusions for serious conditions or multiple births.

<sup>b</sup>Limit of Detection.

<sup>c</sup>Detection frequency.

<sup>d</sup>Geometric mean and 95% Confidence interval.

<sup>e</sup>Sum of four PBDE congeners: BDE-47, -99, -100, and -153.

<sup>f</sup>Percentage of samples with at least one congener above the limit of detection.

<sup>g</sup>Sum of all 10 PBDE congeners: BDE-17, -28, -47, -66, -85, -99, -100, -153, -154, and -183.

**Supplemental Material, Table S3:** Distributions of sociodemographic characteristics for the CHAMACOS children by maternal and child  $\Sigma$ PBDE serum concentrations

| Covariate                                | N (%) <sup>a</sup> | Maternal $\Sigma$ PBDE <sup>b</sup><br>GM (95% CI) | Child $\Sigma$ PBDE <sup>b</sup><br>GM (95% CI) |
|------------------------------------------|--------------------|----------------------------------------------------|-------------------------------------------------|
| Total study population                   | 336                | 26.3 (23.4, 29.6)                                  | 84.4 (76.8, 92.7)                               |
| Maternal age (at delivery)               |                    |                                                    |                                                 |
| 18-24                                    | 141 (42.0)         | 26.2 (21.8, 31.4)                                  | 80.1 (69.3, 92.5)                               |
| 25-29                                    | 111 (33.0)         | 23.9 (20.1, 28.3)                                  | 93.2 (79.5, 109.2)                              |
| 30-34                                    | 54 (16.1)          | 27.2 (18.4, 40.2)                                  | 85.7 (66.5, 110.4)                              |
| 35-45                                    | 30 (8.9)           | 38.0 (24.7, 58.7)                                  | 72.4 (50.5, 103.8)                              |
| Marital status                           |                    |                                                    |                                                 |
| Not married                              | 62 (18.5)          | 33.9 (25.0, 46.0)**                                | 91.1 (73.8, 112.3)                              |
| Married/living as married                | 274 (81.5)         | 24.8 (21.9, 28.1)                                  | 83.0 (74.7, 92.2)                               |
| Maternal education                       |                    |                                                    |                                                 |
| $\leq 6^{\text{th}}$ grade               | 150 (44.6)         | 22.7 (19.4, 26.5)*                                 | 73.1 (64.6, 82.7)**                             |
| 7 <sup>th</sup> – 12 <sup>th</sup> grade | 117 (34.8)         | 28.3 (22.5, 35.4)                                  | 90.0 (76.1, 106.4)                              |
| High School grad                         | 69 (20.5)          | 32.0 (24.9, 41.1)                                  | 102.2 (81.1, 128.8)                             |
| Maternal years in US                     |                    |                                                    |                                                 |
| $\leq 1$                                 | 73 (21.7)          | 14.1 (11.4, 17.5)**                                | 77.2 (63.4, 94.1)**                             |
| 2-5                                      | 88 (26.2)          | 28.9 (22.5, 37.2)                                  | 74.5 (62.3, 89.1)                               |
| 6-10                                     | 85 (25.3)          | 28.9 (24.2, 34.6)                                  | 83.3 (69.4, 99.9)                               |
| 11+                                      | 54 (16.1)          | 32.0 (24.8, 41.2)                                  | 87.0 (66.4, 113.9)                              |
| Entire life                              | 36 (10.7)          | 50.0 (35.9, 69.6)                                  | 129.5 (98.3, 170.4)                             |
| Poverty category (pregnancy)             |                    |                                                    |                                                 |
| <100% of FPL                             | 211 (62.8)         | 26.0 (22.6, 30.0)                                  | 81.9 (73.7, 91.0)                               |
| >100-200% of FPL                         | 125 (37.2)         | 26.9 (21.9, 32.9)                                  | 88.6 (74.1, 106.1)                              |
| Alcohol consumption during pregnancy     |                    |                                                    |                                                 |
| Yes                                      | 73 (22.2)          | 30.2 (24.6, 37.0)                                  | 91.6 (78.5, 106.9)                              |
| No                                       | 256 (77.8)         | 25.7 (23.1, 28.6)                                  | 81.9 (73.0, 92.0)                               |
| Smoked during pregnancy                  |                    |                                                    |                                                 |
| Yes                                      | 14 (4.2)           | 35.4 (11.5, 108.9)                                 | 92.0 (62.8, 134.8)                              |
| No                                       | 322 (95.8)         | 26.1 (23.2, 29.3)                                  | 84.0 (76.2, 92.6)                               |
| ETS-exposed in household (pregnancy)     |                    |                                                    |                                                 |
| Yes                                      | 30 (9.2)           | 31.2 (19.1, 51.1)                                  | 91.6 (70.8, 118.6)                              |
| No                                       | 295 (90.1)         | 25.7 (22.8, 29.0)                                  | 83.8 (75.6, 92.3)                               |

**Supplemental Material, Table S3 (continued):** Distributions of sociodemographic characteristics for the CHAMACOS children by maternal and child  $\Sigma$ PBDE serum concentrations

| Covariate                                    | N (%) <sup>a</sup> | Maternal $\Sigma$ PBDE <sup>b</sup><br>GM (95% CI) | Child $\Sigma$ PBDE <sup>b</sup><br>GM (95% CI) |
|----------------------------------------------|--------------------|----------------------------------------------------|-------------------------------------------------|
| <b>Parity</b>                                |                    |                                                    |                                                 |
| 0                                            | 110 (32.7)         | 24.0 (19.2, 30.0)                                  | 68.9 (58.9, 80.6)**                             |
| 1+                                           | 226 (67.3)         | 27.6 (24.2, 31.6)                                  | 93.1 (82.9, 104.4)                              |
| <b>Child sex</b>                             |                    |                                                    |                                                 |
| Male                                         | 158 (47.0)         | 24.5 (20.6, 29.1)                                  | 88.0 (76.4, 101.4)                              |
| Female                                       | 178 (53.0)         | 27.9 (23.8, 32.7)                                  | 81.3 (71.7, 92.3)                               |
| <b>Birthweight</b>                           |                    |                                                    |                                                 |
| < 2,500g                                     | 12 (3.6)           | 36.4 (18.5, 71.7)                                  | 125.3 (67.7, 232.3)                             |
| 2,500 and over                               | 324 (96.4)         | 26.0 (23.1, 29.3)                                  | 83.4 (75.8, 91.7)                               |
| <b>Preterm birth</b>                         |                    |                                                    |                                                 |
| < 37 weeks                                   | 21 (6.3)           | 33.7 (21.4, 53.3)                                  | 81.0 (57.4, 114.2)                              |
| ≥ 37 weeks                                   | 315 (93.8)         | 25.9 (22.9, 29.2)                                  | 84.7 (76.7, 93.4)                               |
| <b>Breastfeeding<sup>c</sup></b>             |                    |                                                    |                                                 |
| ≤ 3 months                                   | 120 (35.7)         | 31.1 (25.1, 38.6)*                                 | 79.2 (67.7, 92.6)                               |
| 3.1–11.9 months                              | 114 (33.9)         | 25.8 (21.7, 30.6)                                  | 79.5 (68.3, 92.7)                               |
| ≥ 12 months                                  | 102 (30.4)         | 22.4 (17.9, 28.0)                                  | 95.6 (79.9, 114.4)                              |
| <b>Preschool attendance</b>                  |                    |                                                    |                                                 |
| Yes                                          | 222 (69.6)         | 26.7 (23.1, 30.7)                                  | 85.2 (76.2, 95.3)                               |
| No                                           | 97 (30.4)          | 25.2 (20.0, 31.8)                                  | 82.4 (68.2, 99.6)                               |
| <b>HOME Score (at 6 months)</b>              |                    |                                                    |                                                 |
| <31                                          | 139 (42.0)         | 20.3 (17.0, 24.2)**                                | 82.9 (72.5, 94.8)                               |
| 31.1–33.3                                    | 82 (24.8)          | 30.1 (23.5, 38.6)                                  | 79.3 (64.8, 97.1)                               |
| ≥33.4                                        | 110 (33.2)         | 31.5 (25.9, 38.2)                                  | 89.8 (75.3, 107.0)                              |
| <b>HOME Score (at 7 years)</b>               |                    |                                                    |                                                 |
| <17                                          | 98 (31.1)          | 24.5 (20.3, 29.5)                                  | 72.9 (63.0, 84.3)**                             |
| 17-19                                        | 131 (41.6)         | 28.0 (23.2, 33.8)                                  | 80.8 (70.0, 93.2)                               |
| >19                                          | 86 (27.3)          | 25.0 (20.1, 31.2)                                  | 108.3 (88.0, 98.5)                              |
| <b>Father lives with family (at 7 years)</b> |                    |                                                    |                                                 |
| All the time                                 | 232 (73.7)         | 23.6 (20.8, 26.8)**                                | 82.1 (73.4, 91.9)                               |
| Most of the time                             | 13 (4.1)           | 37.0 (22.2, 61.6)                                  | 97.3 (61.6, 153.5)                              |
| Some of the time                             | 18 (5.7)           | 25.7 (12.7, 51.8)                                  | 90.9 (65.3, 126.5)                              |
| Not at all                                   | 52 (16.5)          | 35.3 (26.1, 47.9)                                  | 89.6 (70.8, 113.3)                              |

**Supplemental Material, Table S3 (continued):** Distributions of sociodemographic characteristics for the CHAMACOS children by maternal and child  $\Sigma$ PBDE serum concentrations

| Covariate                                            | N (%) <sup>a</sup> | Maternal $\Sigma$ PBDE <sup>b</sup><br>GM (95% CI) | Child $\Sigma$ PBDE <sup>b</sup><br>GM (95% CI) |
|------------------------------------------------------|--------------------|----------------------------------------------------|-------------------------------------------------|
| Mother works outside of home (at 7 years)            |                    |                                                    |                                                 |
| Yes                                                  | 172 (53.3)         | 25.5 (21.7, 29.8)                                  | 82.6 (72.5, 94.1)                               |
| No                                                   | 151 (46.8)         | 26.9 (22.7, 32.0)                                  | 86.5 (75.4, 99.2)                               |
| Number of Children in Home (at 7 years) <sup>c</sup> |                    |                                                    |                                                 |
| 1                                                    | 33 (10.2)          | 22.4 (13.9, 36.1)                                  | 56.1 (40.2, 78.5)**                             |
| 2                                                    | 92 (28.5)          | 22.7 (18.2, 28.2)                                  | 77.2 (65.8, 90.5)                               |
| 3                                                    | 114 (35.3)         | 28.4 (23.6, 34.1)                                  | 81.2 (69.6, 94.9)                               |
| 4 or more                                            | 84 (26.0)          | 29.4 (23.7, 36.4)                                  | 109.8 (90.8, 132.8)                             |
| Housing density (persons per room at 7 years)        |                    |                                                    |                                                 |
| $\leq 0.5$                                           | 1 (0.3)            | 3.6 (N/A)                                          | 68.5 (N/A)                                      |
| 0.51 – 1.00                                          | 107 (33.0)         | 28.2 (23.3, 34.2)                                  | 95.8 (72.2, 102.0)                              |
| 1.01 – 1.50                                          | 136 (42.0)         | 25.1 (21.1, 30.0)                                  | 79.9 (68.9, 92.6)                               |
| $\geq 1.51$                                          | 80 (24.7)          | 27.6 (21.4, 35.5)                                  | 85.8 (71.0, 103.8)                              |
| Primary language of assessment (at 5 years)          |                    |                                                    |                                                 |
| Spanish                                              | 285 (92.3)         | 24.4 (21.6, 27.5)**                                | 79.1 (71.8, 87.1)**                             |
| English                                              | 25 (7.7)           | 52.6 (33.1, 83.6)                                  | 171.0 (118.7, 246.1)                            |
| Primary language of assessment (at 7 years)          |                    |                                                    |                                                 |
| Spanish                                              | 210 (66.7)         | 22.3 (19.4, 25.6)**                                | 77.8 (70.0, 86.6)**                             |
| English                                              | 105 (33.3)         | 35.1 (29.2, 42.4)                                  | 100.1 (83.5, 120.1)                             |

<sup>a</sup>Children who completed the 5- or 7-year neuropsychological assessment and had maternal *or* child PBDEs.

<sup>b</sup>Sum of 4 PBDE congeners (BDE-47, -99, -100, and -153)

<sup>c</sup>Analyzed in multivariate models as a continuous variable.

\*  $p < 0.1$ ; \*\*  $p \leq 0.05$ ; p-values are for one-way ANOVAs across categories.

**Supplemental Material, Table S4:** Means and standard deviations for attention, neurodevelopment, and motor outcomes in the CHAMACOS cohort at 5- and 7-year visits

| <u>Outcome</u>                                          | <u>N</u> | <u>Mean ± SD</u> |
|---------------------------------------------------------|----------|------------------|
| <b>Assessment of 5-year olds</b>                        |          |                  |
| <i>Attention Outcomes</i>                               |          |                  |
| K-CPT, T-scores                                         |          |                  |
| Errors of Omission                                      | 300      | 54.2 ± 14.4      |
| Errors of Commission                                    | 300      | 54.3 ± 10.1      |
| ADHD Confidence Index                                   | 285      | 45.9 ± 17.7      |
| CBCL, Raw Scores                                        |          |                  |
| Attention Problems                                      | 301      | 2.4 ± 1.6        |
| ADHD                                                    | 301      | 4.6 ± 2.9        |
| <i>Cognitive Outcomes, Standard Scores</i>              |          |                  |
| PPVT                                                    | 305      | 94.6 ± 17.2      |
| Performance IQ                                          | 310      | 95.6 ± 14.4      |
| <i>Motor Outcomes</i>                                   |          |                  |
| WRAVMA Pegboard, Standardized Scores                    |          |                  |
| Dominant Hand                                           | 307      | 111.6 ± 17.3     |
| Non-dominant Hand                                       | 305      | 111.5 ± 16.8     |
| Finger Tap, Raw Score                                   |          |                  |
| Dominant Hand                                           | 285      | 47.8 ± 7.7       |
| Non-dominant Hand                                       | 285      | 41.8 ± 6.4       |
| McCarthy Gross Motor Tests, Raw Score                   |          |                  |
| Gross Motor Leg                                         | 291      | 11.0 ± 2.1       |
| Bean Bag Catch                                          | 303      | 4.2 ± 2.4        |
| <b>Assessment of 7-year olds</b>                        |          |                  |
| <i>Attention Outcomes</i>                               |          |                  |
| Conner's Rating Scale (CADS) – Maternal Report, T-score |          |                  |
| ADHD Index                                              | 323      | 49.9 ± 7.9       |
| DSM-IV ADHD Scale                                       | 323      | 50.3 ± 8.3       |
| Inattentive Subscale                                    | 323      | 48.9 ± 7.7       |
| Hyperactive/Impulsive Subscale                          | 323      | 51.9 ± 8.6       |

**Supplemental Material, Table S4 (continued):** Means and standard deviations for attention, neurodevelopment, and motor outcomes in the CHAMACOS cohort at 5- and 7-year visits

| <u>Outcome</u>                                                | <u>N</u> | <u>Mean ± SD</u> |
|---------------------------------------------------------------|----------|------------------|
| <i>Conner's Rating Scale (CADS) – Teacher Report, T-score</i> |          |                  |
| ADHD Index                                                    | 260      | 53.5 ± 11.6      |
| DSM-IV ADHD Scale                                             | 259      | 52.0 ± 10.0      |
| Inattentive Subscale                                          | 263      | 48.5 ± 8.8       |
| Hyperactive/Impulsive Subscale                                | 263      | 52.2 ± 10.5      |
| <i>BASC-2 – Maternal Report, T-score</i>                      |          |                  |
| Hyperactivity                                                 | 313      | 45.6 ± 8.5       |
| Attention Problems                                            | 313      | 56.4 ± 5.4       |
| <i>BASC-2 – Teacher Report, T-score</i>                       |          |                  |
| Hyperactivity                                                 | 264      | 49.6 ± 10.2      |
| Attention Problems                                            | 264      | 52.9 ± 6.2       |
| <i>Cognitive Outcomes</i>                                     |          |                  |
| Full-Scale IQ, Scaled Scores                                  | 285      | 104.0 ± 14.3     |
| Verbal Comprehension IQ                                       | 315      | 106.4 ± 16.9     |
| Perceptual Reasoning IQ                                       | 315      | 102.8 ± 16.2     |
| Working Memory IQ                                             | 286      | 93.6 ± 13.6      |
| Processing Speed IQ                                           | 286      | 108.4 ± 13.0     |
| <i>Motor Outcomes</i>                                         |          |                  |
| <i>WRAVMA Pegboard, Scaled Scores</i>                         |          |                  |
| Dominant Hand                                                 | 315      | 121.0 ± 18.0     |
| Non-dominant Hand                                             | 314      | 123.7 ± 18.0     |
| <i>Finger Tap, Raw Scores<sup>a</sup></i>                     |          |                  |
| Dominant Hand                                                 | 315      | 32.4 ± 6.3       |
| Non-dominant Hand                                             | 314      | 28.7 ± 5.6       |
| <i>McCarthy Gross Motor Tests, Raw Score<sup>a</sup></i>      |          |                  |
| Gross Motor Leg                                               | 311      | 12.4 ± 1.0       |
| Bean Bag Catch                                                | 314      | 4.9 ± 2.0        |

<sup>a</sup>For statistical analyses, these were converted to Z-scores for the CHAMACOS population.



**Supplemental Material, Table S5:** Adjusted logistic models for dichotomous attention-related outcomes in CHAMACOS children ages 5 and 7 years: odds ratios per 10-fold increase in maternal prenatal and child  $\Sigma$ PBDE concentration (ng/g, lipid-adjusted)

|                                                             | Maternal $\Sigma$ PBDE <sup>a,c</sup> |                  | Child $\Sigma$ PBDE <sup>b,c</sup> |                   |
|-------------------------------------------------------------|---------------------------------------|------------------|------------------------------------|-------------------|
|                                                             | Cases/N                               | OR (95% CI)      | Cases/N                            | OR (95% CI)       |
| <b>Assessment of 5-year olds</b>                            |                                       |                  |                                    |                   |
| Child Behavior Checklist <sup>d</sup>                       |                                       |                  |                                    |                   |
| Attention problems                                          | 8/249                                 | 4.6 (0.9, 24.5)* |                                    |                   |
| ADHD                                                        | 16/249                                | 1.7 (0.5, 5.9)   |                                    |                   |
| K-CPT                                                       |                                       |                  |                                    |                   |
| ADHD Confidence Index $\geq 70\%$                           | 21/233                                | 3.4 (1.2, 9.5)** |                                    |                   |
| <b>Assessment of 7-year olds</b>                            |                                       |                  |                                    |                   |
| Conner's Rating Scale (CADS) – Maternal Report <sup>e</sup> |                                       |                  |                                    |                   |
| ADHD Index                                                  | 15/266                                | 3.0 (1.0, 8.9)** | 16/270                             | 1.9 (0.4, 8.4)    |
| DSM-IV ADHD scale                                           | 13/266                                | 1.8 (0.5, 6.1)   | 13/270                             | 1.9 (0.3, 10.7)   |
| Inattentive subscale                                        | 11/266                                | 1.6 (0.4, 6.0)   | 9/270                              | 0.8 (0.1, 6.2)    |
| Hyperactive/Impulsive subscale                              | 15/266                                | 1.8 (0.6, 5.8)   | 16/270                             | 2.2 (0.5, 10.6)   |
| BASC-2 – Maternal Report <sup>f</sup>                       |                                       |                  |                                    |                   |
| Hyperactivity scale                                         | 11/257                                | 1.9 (0.5, 8.3)   | 17/269                             | 1.7 (0.4, 7.3)    |
| Attention problems scale                                    | 46/257                                | 1.7 (0.7, 3.7)   | 46/269                             | 0.8 (0.3, 2.0)    |
| Conner's Rating Scale (CADS) – Teacher Report <sup>e</sup>  |                                       |                  |                                    |                   |
| ADHD Index                                                  | 35/213                                | 1.7 (0.7, 4.1)   | 41/219                             | 2.3 (0.8, 6.8)    |
| DSM-IV Total scale                                          | 23/212                                | 1.1 (0.4, 3.3)   | 29/217                             | 5.5 (1.5, 20.3)** |
| Inattentive subscale                                        | 12/216                                | 1.5 (0.4, 6.0)   | 14/221                             | 3.7 (0.6, 21.9)   |
| Hyperactive/Impulsive subscale                              | 23/216                                | 1.5 (0.6, 4.3)   | 29/221                             | 4.5 (1.2, 16.6)** |
| BASC-2 – Teacher Report <sup>f</sup>                        |                                       |                  |                                    |                   |
| Hyperactivity scale                                         | 28/217                                | 1.1 (0.4, 3.0)   | 34/222                             | 3.4 (1.0, 11.7)*  |
| Attention problems scale                                    | 38/217                                | 1.5 (0.6, 3.4)   | 46/222                             | 3.6 (1.2, 10.4)** |
| Parent report – ever told child has:                        |                                       |                  |                                    |                   |
| Attention problems                                          | 25/266                                | 2.3 (0.9, 5.8)*  | 31/270                             | 1.5 (0.5, 4.6)    |
| Learning problems                                           | 34/266                                | 1.1 (0.5, 2.7)   | 37/270                             | 0.8 (0.3, 2.1)    |
| Teacher report – does child have:                           |                                       |                  |                                    |                   |
| Emotional problem                                           | 36/203                                | 0.7 (0.3, 1.8)   | 36/208                             | 0.9 (0.3, 2.9)    |
| Behavioral problem                                          | 45/199                                | 2.5 (1.1, 6.0)** | 60/206                             | 1.5 (0.6, 4.0)    |
| Learning problem                                            | 64/198                                | 1.7 (0.8, 3.6)   | 64/204                             | 0.9 (0.4, 2.4)    |

**Supplemental Material, Table S5 (continued):** Adjusted logistic models for dichotomous attention-related outcomes in CHAMACOS children ages 5 and 7 years: odds ratios per 10-fold increase in maternal prenatal and child  $\Sigma$ PBDE concentration (ng/g, lipid-adjusted)

Abbreviations: ADHD = attention deficit hyperactivity disorder; CI = confidence interval; PBDE = polybrominated diphenyl ethers, K-CPT = Kiddie Continuous Performance Test

<sup>a</sup>Maternal PBDE models control for age, sex, maternal education, number of children in the home, and psychometrician (5-year assessments only).

<sup>b</sup>Child PBDE models control for age, sex, and parity.

<sup>c</sup>Sum of four PBDE congeners: BDE-47, -99, -100, and -153.

<sup>d</sup>Score in “borderline” or “clinical” range.

<sup>e</sup>Score in “moderately atypical” or “markedly atypical” range.

<sup>f</sup>Score in “at risk” or “clinically significant” range.

\*p<0.1; \*\* p≤0.05

**Supplemental Material, Table S6:** Results for models using the sum of 4 PBDE congeners (primary analysis), sum of 10 congeners, and individual congeners BDE-47, -99, -100, and -153:  $\beta$ s and 95% CIs for a 10-fold increase in the congener(s) indicated.

|                                 | $\Sigma$ 4 Congeners | $\Sigma$ 10 Congeners | BDE-47              | BDE-99              | BDE-100              | BDE-153              |
|---------------------------------|----------------------|-----------------------|---------------------|---------------------|----------------------|----------------------|
| <b>ATTENTION</b>                |                      |                       |                     |                     |                      |                      |
| <b>Maternal PBDEs</b>           |                      |                       |                     |                     |                      |                      |
| K-CPT (5 years)                 |                      |                       |                     |                     |                      |                      |
| Errors of Omission              | 5.8 (1.5, 10.1)**    | 5.9 (1.5, 10.4)**     | 5.1 (1.0, 9.3)**    | 6.6 (2.6, 10.6)**   | 4.2 (0.0, 8.4)*      | 4.5 (0.0, 8.9)*      |
| ADHD Conf. Index                | 7.0 (1.6, 12.4)**    | 7.2 (1.7, 12.8)**     | 6.2 (1.1, 11.4)**   | 7.2 (2.1, 12.2)**   | 5.7 (0.4, 10.9)**    | 5.8 (0.2, 11.3)**    |
| Mother-reported CADS (7 years)  |                      |                       |                     |                     |                      |                      |
| ADHD Index                      | 2.9 (0.7, 5.2)**     | 3.1 (0.7, 5.4)**      | 2.6 (0.4, 4.8)**    | 3.0 (0.9, 5.0)**    | 2.9 (0.7, 5.1)**     | 3.1 (0.6, 5.5)**     |
| DSM-IV ADHD                     | 2.6 (0.2, 5)**       | 2.7 (0.3, 5.2)**      | 2.2 (0.0, 4.5)*     | 2.7 (0.6, 4.9)**    | 2.6 (0.2, 4.9)**     | 2.5 (-0.1, 5.0)*     |
| DSM-IV Inattentive              | 2.2 (0.0, 4.5)**     | 2.4 (0.1, 4.7)**      | 1.9 (-0.2, 4.0)*    | 2.5 (0.4, 4.5)**    | 2.1 (-0.1, 4.3)*     | 2.1 (-0.3, 4.5)*     |
| DSM-IV Hyperactive              | 1.6 (-0.8, 4.1)      | 1.7 (-0.8, 4.2)       | 1.3 (-1.0, 3.7)     | 1.9 (-0.4, 4.1)*    | 1.7 (-0.7, 4.2)      | 1.7 (-1.0, 4.3)      |
| <b>Child PBDEs</b>              |                      |                       |                     |                     |                      |                      |
| Teacher-Reported CADS (7 years) |                      |                       |                     |                     |                      |                      |
| ADHD Index                      | 4.6 (-0.4, 9.6)*     | 4.7 (-0.4, 9.7)*      | 3.7 (-1.0, 8.4)     | 3.3 (-1.0, 7.7)     | 4.5 (-0.3, 9.3)*     | 4.5 (-0.4, 9.4)*     |
| DSM-IV ADHD                     | 4.0 (-0.3, 8.3)*     | 4.1 (-0.3, 8.4)*      | 3.1 (-0.9, 7.2)     | 2.7 (-1.1, 6.4)     | 3.8 (-0.3, 7.9)*     | 4.1 (-0.2, 8.3)*     |
| DSM-IV Inattentive              | 3.7 (0.1, 7.4)**     | 3.8 (0.0, 7.5)**      | 2.9 (-0.5, 6.4)*    | 2.5 (-0.7, 5.7)     | 3.4 (-0.1, 6.9)*     | 3.9 (0.3, 7.5)**     |
| Teacher-Reported BASC (7 years) |                      |                       |                     |                     |                      |                      |
| Hyperactivity                   | 4.8 (0.5, 9.0)**     | 4.9 (0.6, 9.2)**      | 4.0 (0, 8.1)**      | 3.6 (-0.1, 7.3)*    | 4.6 (0.5, 8.7)**     | 3.9 (-0.3, 8.1)*     |
| Attention Problems              | 2.9 (0.4, 5.5)**     | 3.0 (0.3, 5.6)**      | 2.6 (0.2, 5.1)**    | 2.4 (0.1, 4.6)**    | 2.6 (0.1, 5.1)**     | 2.0 (-0.6, 4.6)      |
| <b>COGNITION</b>                |                      |                       |                     |                     |                      |                      |
| <b>Maternal PBDEs</b>           |                      |                       |                     |                     |                      |                      |
| Full-scale IQ (7 years)         |                      |                       |                     |                     |                      |                      |
| Verbal Comp                     | -4.7 (-9.4, 0.1)*    | -4.8 (-9.7, 0.0)*     | -3.8 (-8.3, 0.7)    | -4.5 (-8.6, -0.3)** | -3.9 (-8.7, 0.8)     | -5.5 (-10.6, -0.3)** |
|                                 | -5.5 (-10, -1.0)**   | -5.7 (-10.3, -1.1)**  | -4.6 (-8.9, -0.3)** | -4.9 (-8.9, -0.9)** | -5.9 (-10.5, -1.4)** | -6.2 (-11.2, -1.1)** |
| <b>Child PBDEs</b>              |                      |                       |                     |                     |                      |                      |
| Full-scale IQ (7 years)         |                      |                       |                     |                     |                      |                      |
| Verbal Comp                     | -5.6 (-10.8, -0.3)** | -5.6 (-10.9, -0.3)**  | -4.2 (-9.2, 0.7)*   | -4.5 (-9.0, 0.0)*   | -5.3 (-10.4, -0.3)** | -6.8 (-12.0, -1.6)** |
| Perceptual Reasoning            | -4.3 (-9.4, 0.8)*    | -4.4 (-9.5, 0.8)*     | -3.5 (-8.2, 1.3)    | -3.8 (-8.1, 0.6)*   | -4.7 (-9.6, 0.2)*    | -5.1 (-10.2, 0.1)*   |
| Working Memory                  | -5.2 (-11.1, 0.7)*   | -5.2 (-11.2, 0.8)*    | -4.4 (-9.9, 1.1)    | -4.8 (-9.8, 0.3)*   | -5 (-10.7, 0.7)*     | -4.2 (-10.2, 1.8)    |
| Processing Speed                | -2.3 (-7.4, 2.8)     | -2.3 (-7.5, 2.9)      | -0.7 (-5.5, 4.1)    | -1.3 (-5.7, 3.1)    | -2.0 (-7.0, 2.9)     | -5.7 (-10.8, -0.6)** |
|                                 | -6.6 (-11.4, -1.8)** | -6.7 (-11.5, -1.8)**  | -5.5 (-10, -1.0)**  | -5.0 (-9.2, -0.9)** | -5.7 (-10.3, -1.0)** | -7.2 (-12.0, -2.4)** |

**Supplemental Material, Table S6 (continued):** Results for models using the sum of 4 PBDE congeners (primary analysis), sum of 10 congeners, and individual congeners BDE-47, -99, -100, and -153:  $\beta$ s and 95% CIs for a 10-fold increase in the congener(s) indicated.

|                              | $\Sigma$ 4 Congeners | $\Sigma$ 10 Congeners | BDE-47             | BDE-99               | BDE-100              | BDE-153            |
|------------------------------|----------------------|-----------------------|--------------------|----------------------|----------------------|--------------------|
| <b>MOTOR</b>                 |                      |                       |                    |                      |                      |                    |
| <b>Maternal PBDEs</b>        |                      |                       |                    |                      |                      |                    |
| WRAVMA Pegboard (5 years)    |                      |                       |                    |                      |                      |                    |
| Dominant Hand                | -4.3 (-9.6, 1.0)     | -4.3 (-9.8, 1.2)      | -3.5 (-8.6, 1.6)   | -4.6 (-9.3, 0.1)*    | -3.9 (-9.1, 1.4)     | -4.4 (-10.2, 1.4)  |
| Non-dominant Hand            | -5.6 (-10.8, -0.4)** | -5.6 (-11, -0.3)**    | -5.0 (-10.0, 0.0)* | -5.4 (-10.1, -0.8)** | -5.5 (-10.6, -0.4)** | -5.6 (-11.2, 0.1)* |
| Finger-Tap z-Score (5 years) |                      |                       |                    |                      |                      |                    |
| Dominant Hand                | -0.4 (-0.7, 0.0)**   | -0.4 (-0.7, 0.0)**    | -0.3 (-0.6, 0.0)*  | -0.4 (-0.7, -0.1)**  | -0.3 (-0.7, 0.0)*    | -0.3 (-0.6, 0.1)   |
| WRAVMA Pegboard (7 years)    |                      |                       |                    |                      |                      |                    |
| Dominant Hand                | -5.4 (-11.1, 0.3)*   | -6.0 (-11.9, -0.2)**  | -3.6 (-9.0, 1.9)   | -6.7 (-11.7, -1.6)** | -5.4 (-11.1, 0.3)*   | -6.1 (-12.5, 0.2)* |
| Non-dominant Hand            | -6.5 (-12.3, -0.7)** | -7.1 (-13, -1.1)**    | -4.8 (-10.4, 0.7)* | -7.6 (-12.7, -2.5)** | -6.1 (-11.9, -0.3)** | -6.2 (-12.7, 0.2)* |
| <b>Child PBDEs (7 years)</b> |                      |                       |                    |                      |                      |                    |
| Dominant Hand                | -5.4 (-12.0, 1.2)    | -5.5 (-12.2, 1.2)     | -4.2 (-10.4, 2.0)  | -5.3 (-11.0, 0.4)*   | -5.9 (-12.2, 0.5)*   | -3.9 (-10.5, 2.7)  |
| Non-dominant Hand            | -6.1 (-12.7, 0.4)*   | -6.3 (-12.9, 0.4)*    | -5.3 (-11.4, 0.9)* | -5.8 (-11.4, -0.1)** | -6.3 (-12.6, 0.0)**  | -3.8 (-10.4, 2.7)  |

Abbreviations: ADHD = attention deficit hyperactivity disorder; CI = confidence interval; PBDE = polybrominated diphenyl ethers; K-CPT = Kiddie Continuous Performance Test; CADS = Conners' ADHD/DSM-IV Scales; BASC= Behavior Assessment Scale for Children; WRAVMA= Range Assessment of Visual Motor Ability Maternal and child PBDE models control for same covariates as primary model (sum of 4 congeners).

\* $p < 0.1$ ; \*\* $p < 0.05$
